# Supplementary material for: Co-occurring autism, ADHD, and gender dysphoria in children, adolescents, and young adults with eating disorders: an examination of pre- vs. post-COVID pandemic outbreak trends with real-time electronic health record data
Source: PubMed Central journal article supplement (PMC11370642; doi:10.3389/fpsyt.2024.1402312), 2024-08-20

## Supplementary Information

We conducted propensity score-matched analyses that evaluate the risk of psychiatric diagnoses in the 365 days AFTER the index ED diagnosis. To accomplish this, people with EDs in the 2017-2019 and 2020-2022 cohorts were MATCHED to each other via demographics and prior history of psychiatric comorbidities in the 365 days preceding the index date.

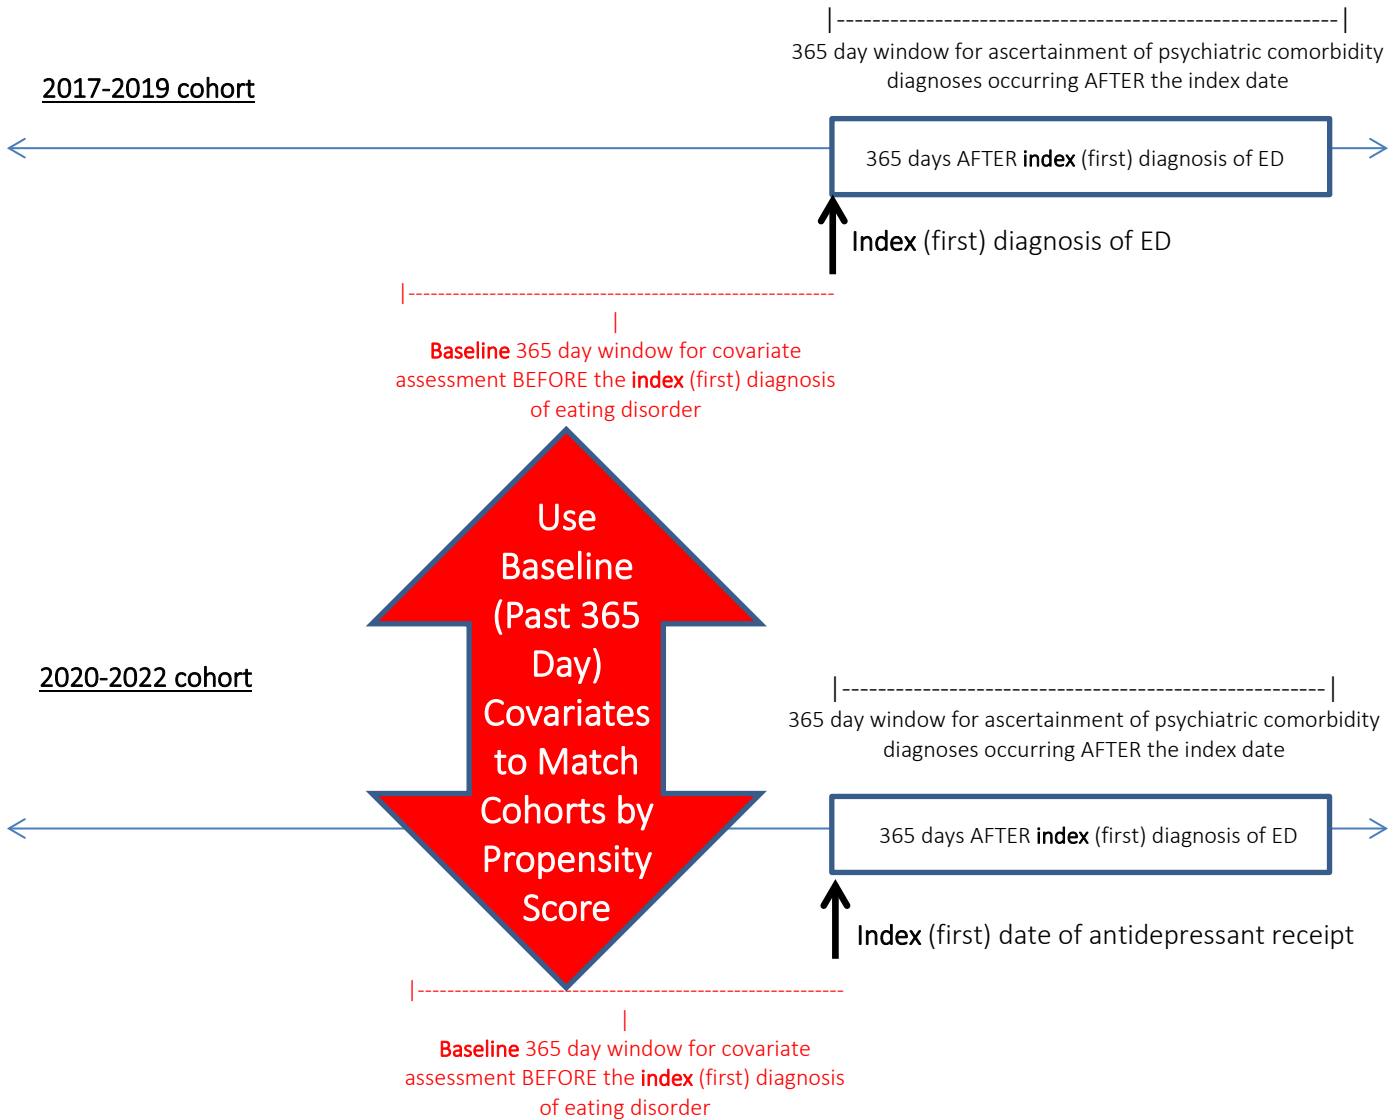

Supplement: Image1.pdf [file Image1.pdf]
