# Supplementary material for: Co-occurring autism, ADHD, and gender dysphoria in children, adolescents, and young adults with eating disorders: an examination of pre- vs. post-COVID pandemic outbreak trends with real-time electronic health record data
Source: PubMed Central journal article supplement (PMC11370642; doi:10.3389/fpsyt.2024.1402312), 2024-08-20
Supplement: Table1.pdf [file Table1.pdf]

**Supplementary Table – Coding of Variables in the TriNetX Databases**

| <b>Variables</b>                | <b>ICD-10-CM codes</b> |
|---------------------------------|------------------------|
| Psychiatric disorders           | F01-F99                |
| Alcohol use disorder            | F10                    |
| Substance use disorder          | F10-19                 |
| Opioid use disorder             | F11                    |
| Cannabis use disorder           | F12                    |
| Other Stimulant use disorders   | F15                    |
| Nicotine use disorder           | F17                    |
| Mood Disorders (MDD, BPAD)      | F30-F39                |
| specific phobia                 | F40                    |
| Panic disorder                  | F41.0                  |
| GAD                             | F41.1                  |
| OCD                             | F42                    |
| PTSD                            | F43.1                  |
| Adjustment disorder             | F43.2                  |
| Eating disorders                | F50                    |
| Personality disorders           | F60                    |
| Borderline Personality Disorder | F60.3                  |
| Gender dysphoria                | F64                    |
| Autism                          | F84.0                  |
| ADHD                            | F90                    |
